# Supplementary material
Source: MDPI journal article supplement (https://www.mdpi.com/2071-1050/15/21/15286)
Supplement: s1 [file s1]

# Supplementary Materials

**Table S1.** The main geographical features of the research area.

| Type of geographical characteristic                | Research area geographical information                                                                                                              |
|----------------------------------------------------|-----------------------------------------------------------------------------------------------------------------------------------------------------|
| Spatial distribution by countries                  | Slovenia, Croatia, Bosnia and Herzegovina, Serbia, and Montenegro                                                                                   |
| Latitude                                           | 41.51°N–46.52°N                                                                                                                                     |
| Longitude                                          | 13.23°E–23.00°E                                                                                                                                     |
| Total geographical area (km <sup>2</sup> )         | 230.387                                                                                                                                             |
| Population number (in million)                     | 16.731.211                                                                                                                                          |
| Capital cities in the research area                | Ljubljana, Zagreb, Sarajevo, Belgrade, Podgorica                                                                                                    |
| Landscape—mountainous (the Alps and the Dinarides) | North, central, and west Slovenia, west and south Croatia, central and west Bosnia and Herzegovina, northeast Montenegro, west and southwest Serbia |
| Landscape—plain (Pannonian Plain)                  | Northeast Slovenia, east Croatia, north Bosnia& Herzegovina, north Serbia                                                                           |
| Landscape—coastal (Adriatic coast)                 | Southwest Slovenia, west Croatia, southwest Bosnia and Herzegovina, southwest Montenegro                                                            |
| Climate—in higher landscape                        | Alpine or mountainous climate                                                                                                                       |
| Climate—in lower landscape                         | Moderate continental climate                                                                                                                        |
| Climate – coastline                                | Mediterranean climate                                                                                                                               |

|                                   |                                                                                    |                                                                                    |                                                                                     |                                                                                      |
|-----------------------------------|------------------------------------------------------------------------------------|------------------------------------------------------------------------------------|-------------------------------------------------------------------------------------|--------------------------------------------------------------------------------------|
| Aerial photo of 1 km <sup>2</sup> |  |  |  |  |
| LCZ type (Stewart and Oke, 2012)  | LCZB/LCZ2                                                                          | LCZ8/LCZB                                                                          | LCZB                                                                                | LCZD                                                                                 |
| Climate type (Kottek et al. 2006) | Cfa — continental                                                                  | Cfa — continental                                                                  | Cfa — continental                                                                   | Cfa — continental                                                                    |
| MD % (PET)                        | 0.0%                                                                               | 1.6%                                                                               | 0.1%                                                                                | 0.3%                                                                                 |
| Alt.                              | 132                                                                                | 121                                                                                | 202                                                                                 | 84                                                                                   |

| Long.  | Alt. | MD<br>%<br>(PET) | Climate type<br>(Kottek et al.<br>2006) | LCZ type<br>(Stewart and<br>Oke, 2012) | Aerial photo of 1 km <sup>2</sup>                                                    | No | Country | Station<br>name | Abb. | Lat.   | Long.  |
|--------|------|------------------|-----------------------------------------|----------------------------------------|--------------------------------------------------------------------------------------|----|---------|-----------------|------|--------|--------|
| 21°55' | 432  | 0.0%             | Cfa —<br>continental                    | LCZ8                                   |    | 1  | Serbia  | Belgrade        | BG   | 44°48' | 20°28' |
| 14°86' | 467  | 0.1%             | Cfb —<br>continental                    | LCZD/LCZ6                              |    | 2  | Serbia  | Loznica         | LO   | 44°33' | 19°14' |
| 16°45' | 256  | 0.3%             | Cfb —<br>continental                    | LCZ6/LCZD                              |   | 3  | Serbia  | Niš             | NI   | 43°20' | 21°54' |
| 14°30' | 298  | 0.0%             | Cfb —<br>continental                    | LCZ2/LCZ3                              |  | 4  | Serbia  | Novi Sad        | NS   | 45°19' | 19°49' |

| Lat.   | Long.  | Alt. | MD<br>%<br>(PET) | Climate type<br>(Kottek et al.<br>2006) | LCZ type<br>(Stewart and<br>Oke, 2012) | Aerial photo of 1 km <sup>2</sup>                                                    | No | Country  | Station<br>name | Abb. | Lat.   |
|--------|--------|------|------------------|-----------------------------------------|----------------------------------------|--------------------------------------------------------------------------------------|----|----------|-----------------|------|--------|
| 46°39' | 16°11' | 182  | 0.5%             | Cfb—<br>continental                     | LCZD                                   |    | 5  | Serbia   | Vranje          | VR   | 42°33' |
| 45°57' | 13°39' | 108  | 0.3%             | Cfb—<br>continental                     | LCZB                                   |    | 6  | Slovenia | Kočevje         | KO   | 45°64' |
| 45°48' | 15°10' | 214  | 0.2%             | Cfb—<br>continental                     | LCZB/LCZ6                              |   | 7  | Slovenia | Lendava         | LE   | 46°56' |
| 45°29' | 13°36' | 7    | 0.0%             | Csc—<br>Mediterranean                   | LCZD/LCZE                              |  | 8  | Slovenia | Ljubljana       | LJ   | 46°03' |

| Abb. | Lat.   | Long.  | Alt. | MD %<br>(PET) | Climate type<br>(Kottek et al.<br>2006) | LCZ type<br>(Stewart and<br>Oke, 2012) | Aerial photo of 1 km <sup>2</sup>                                                    | No | Country  | Station<br>name  | Abb. |
|------|--------|--------|------|---------------|-----------------------------------------|----------------------------------------|--------------------------------------------------------------------------------------|----|----------|------------------|------|
| PO   | 45°49' | 14°15' | 461  | 0.0%          | Cfb —<br>continental                    | LCZD/LCZ6                              | 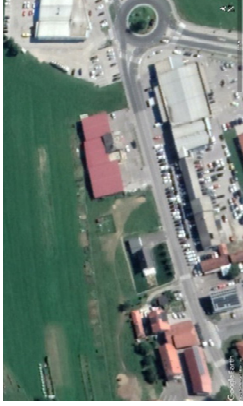   | 9  | Slovenia | Murska<br>Sobota | MS   |
| ZA   | 44°48' | 14°58' | 1594 | 0.0%          | Dfb — boreal                            | LCZA/LCZD                              |    | 10 | Slovenia | Nova Go-<br>rica | NG   |
| ZG   | 45°48' | 15°58' | 157  | 1.5%          | Cfb —<br>continental                    | LCZ3                                   |   | 11 | Slovenia | Novo<br>Mesto    | NM   |
| ZD   | 44°07' | 15°12' | 5    | 0.0%          | Csa — Mediter-<br>ranean                | LCZ6/LCZB/<br>LCZG                     |  | 12 | Slovenia | Portorož         | PR   |



| Station name | Abb. | Lat.   | Long.  | Alt. | MD % (PET) | Climate type (Kottek et al. 2006) | LCZ type (Stewart and Oke, 2012) | Aerial photo of 1 km <sup>2</sup>                                                   | No | Country  | Station name |
|--------------|------|--------|--------|------|------------|-----------------------------------|----------------------------------|-------------------------------------------------------------------------------------|----|----------|--------------|
| Varaždin     | VŽ   | 46°16' | 16°21' | 167  | 0.0%       | Cfb—continental                   | LCZD                             |    | 13 | Slovenia | Postojna     |
| Split        | ST   | 43°30' | 16°25' | 122  | 0.0%       | Csa—Mediterranean                 | LCZB                             |    | 14 | Croatia  | Zavižan      |
| Rijeka       | RI   | 45°20' | 14°26' | 120  | 0.0%       | Csc—Mediterranean                 | LCZB/LCZ9                        |   | 15 | Croatia  | Zagreb       |
| Pula         | PU   | 44°53' | 13°55' | 63   | 1.4%       | Csc—Mediterranean                 | LCZD/LCZE                        |  | 16 | Croatia  | Zadar        |

| Station name | Abb. | Lat.   | Long.  | Alt. | MD % (PET) | Climate type (Kottek et al. 2006) | LCZ type (Stewart and Oke, 2012) | Aerial photo of 1 km <sup>2</sup>                                                   | No | Country |
|--------------|------|--------|--------|------|------------|-----------------------------------|----------------------------------|-------------------------------------------------------------------------------------|----|---------|
| Osijek       | OS   | 45°30' | 18°33' | 89   | 0.0%       | Cfa—continental                   | LCZD                             |    | 17 | Croatia |
| Dubrovnik    | DU   | 42°38' | 18°05' | 52   | 0.0%       | Csa—Mediterranean                 | LCZB/LCZ9/LCZ8                   |    | 18 | Croatia |
| Nikšić       | NK   | 42°46' | 18°57' | 635  | 2.3%       | Cfb—continental                   | LCZB/LCZ8                        |   | 19 | Croatia |
| Pljevlja     | PV   | 43°35' | 19°35' | 784  | 0.6%       | Cfb—continental                   | LCZA/LCZ8                        |  | 20 | Croatia |

| Station name | Abb. | Lat.   | Long.  | Alt. | MD % (PET) | Climate type (Kottek et al. 2006) | LCZ type (Stewart and Oke, 2012) | Aerial photo of 1 km <sup>2</sup>                                                   | No | Country    |
|--------------|------|--------|--------|------|------------|-----------------------------------|----------------------------------|-------------------------------------------------------------------------------------|----|------------|
| Podgorica    | PG   | 42°43' | 19°27' | 49   | 2.5%       | Csa — Mediterranean               | LCZ6/LCZ E                       |    | 21 | Croatia    |
| Banja Luka   | BL   | 44°47' | 17°12' | 151  | 0.0%       | Cfb — continental                 | LCZ6                             |    | 22 | Croatia    |
| Bijeljina    | BN   | 44°45' | 19°12' | 90   | 0.0%       | Cfa — continental                 | LCZ6                             |   | 23 | Montenegro |
| Doboj        | DO   | 44°44' | 18°05' | 143  | 1.4%       | Cfa — continental                 | LCZ5/LCZ D                       |  | 24 | Montenegro |

| Station name | Abb. | Lat.   | Long.  | Alt. | MD % (PET) | Climate type (Kottek et al. 2006) | LCZ type (Stewart and Oke, 2012) | Aerial photo of 1 km <sup>2</sup>                                                   | No | country                |
|--------------|------|--------|--------|------|------------|-----------------------------------|----------------------------------|-------------------------------------------------------------------------------------|----|------------------------|
| Mostar       | MO   | 43°21' | 17°48' | 70   | 0.0%       | Csb— Mediterranean                | LCZ5/LCZ6                        | 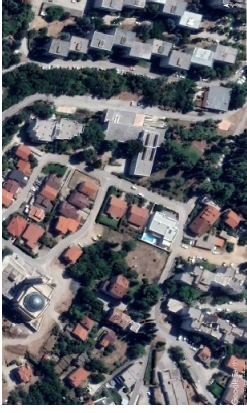   | 25 | Montenegro             |
| Sarajevo     | SA   | 43°52' | 18°26' | 630  | 0.0%       | Cfb— continental                  | LCZ3                             |    | 26 | Bosnia and Herzegovina |
| Trebinje     | TB   | 42°42' | 18°20' | 299  | 0.6%       | Csb— Mediterranean                | LCZ6                             |   | 27 | Bosnia and Herzegovina |
| Tuzla        | TZ   | 44°33' | 18°42' | 305  | 1.3%       | Cfb— continental                  | LCZB/LCZE                        |  | 28 | Bosnia and Herzegovina |



|         |                        |                        |                        |                        |
|---------|------------------------|------------------------|------------------------|------------------------|
| Country | Bosnia and Herzegovina | Bosnia and Herzegovina | Bosnia and Herzegovina | Bosnia and Herzegovina |
| No      | 29                     | 30                     | 31                     | 32                     |

**Figure S1.** Spatial characteristics of each meteorological station surrounding. Note: Aerial photo background is based on the Google Earth Pro.

**Table S2.** Physiological Equivalent Temperature (PET) range for different levels of thermo-physiological stress (Matzarakis and Mayer, 1996).

| PET range (°C) | Level of thermal stress |
|----------------|-------------------------|
| > 41.0         | extreme heat stress     |
| 35.1– 41.0     | strong heat stress      |
| 29.1– 35.0     | moderate heat stress    |
| 23.1– 29.0     | slight heat stress      |
| 18.1– 23.0     | no thermal stress       |
| 13.1– 18.0     | slight cold stress      |
| 8.1– 13.0      | moderate cold stress    |
| 4.1– 8.0       | strong cold stress      |
| < 4.1          | extreme cold stress     |

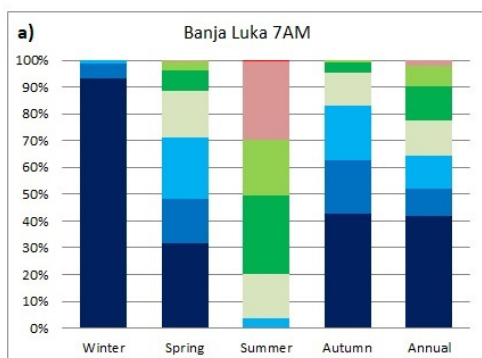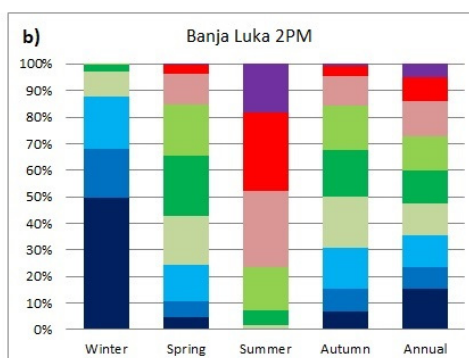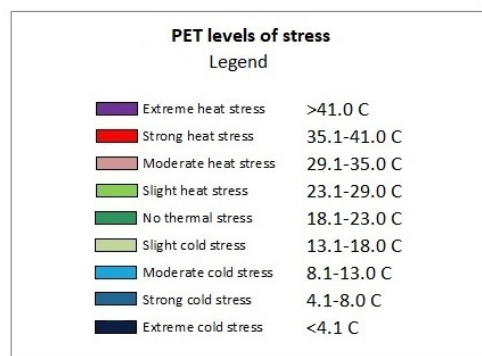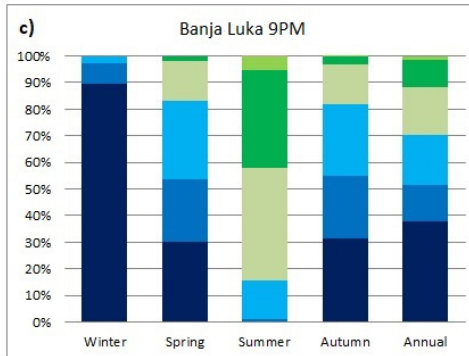

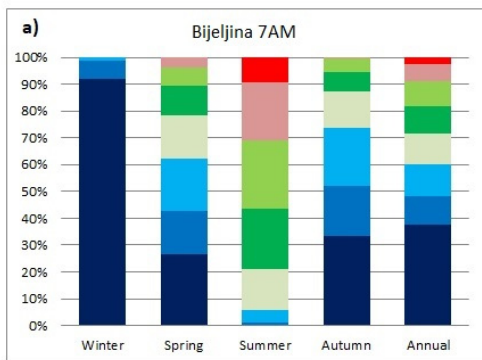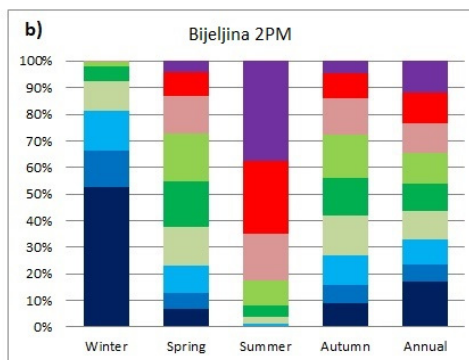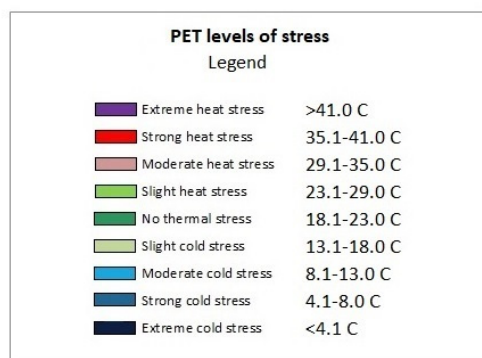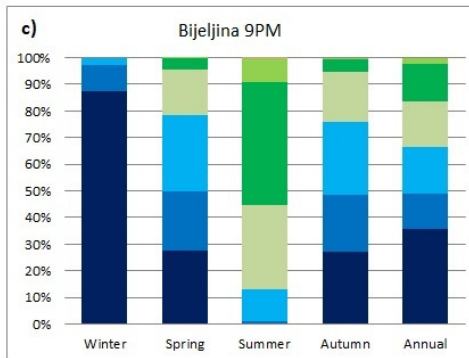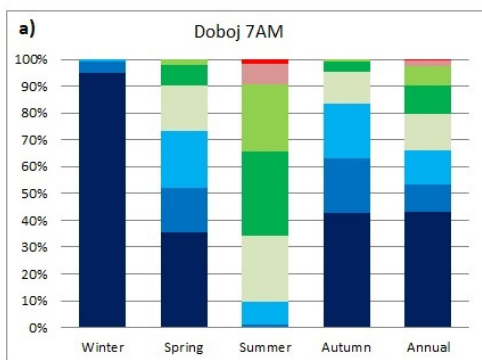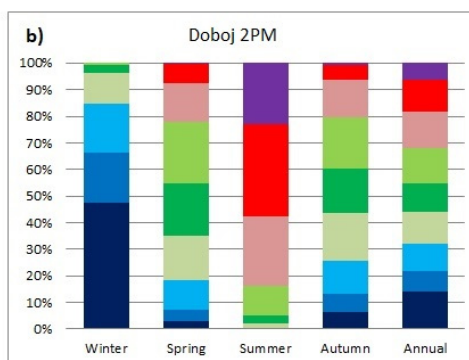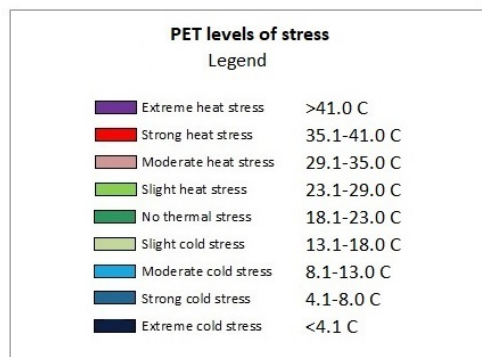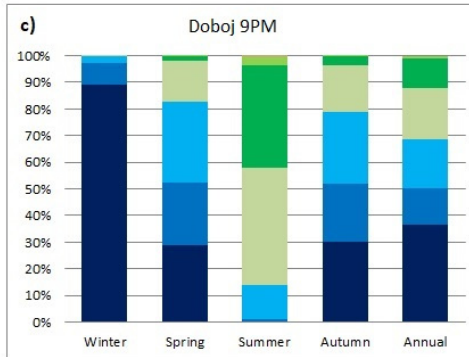

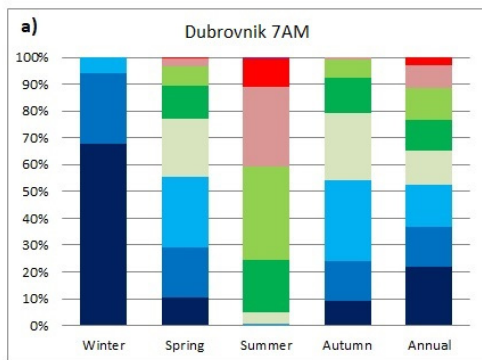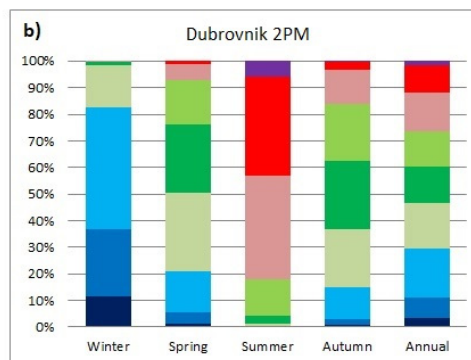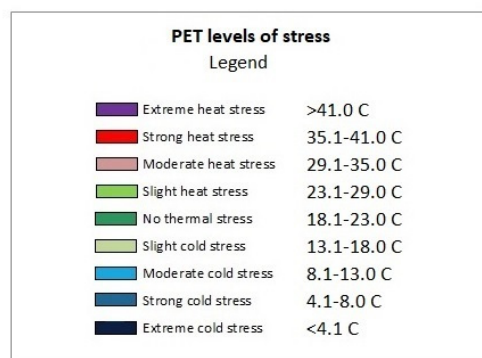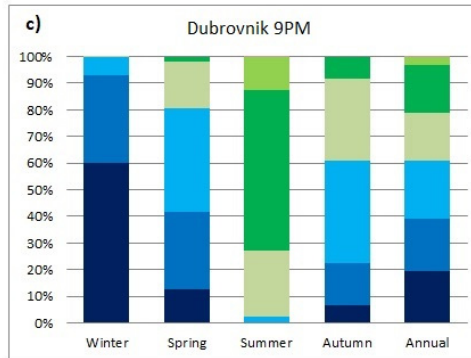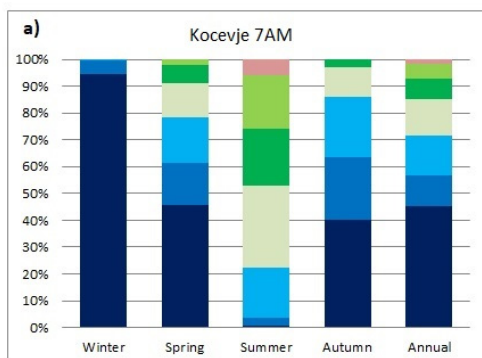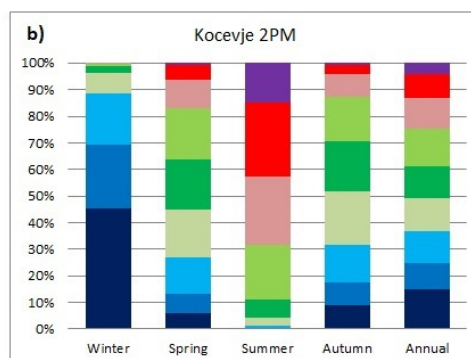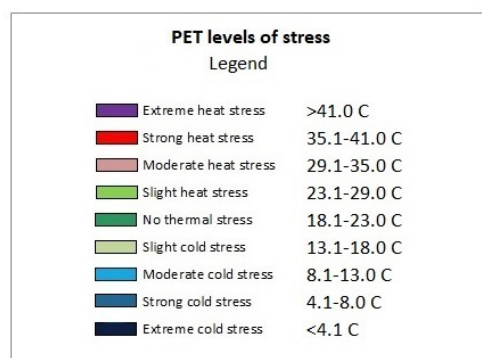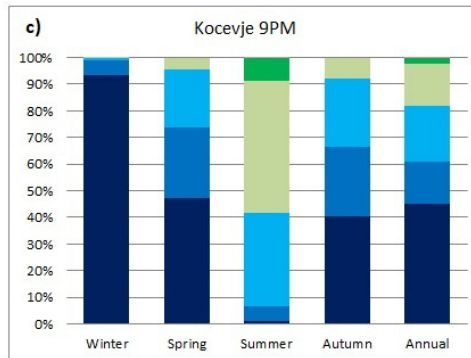

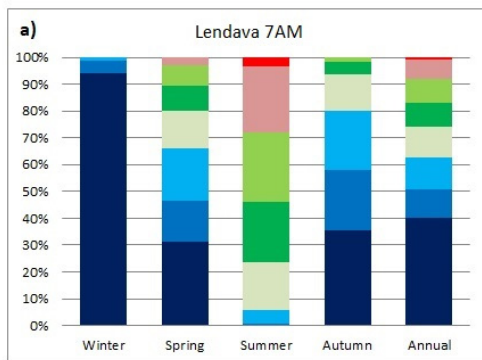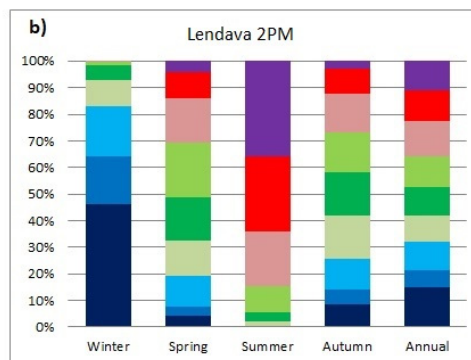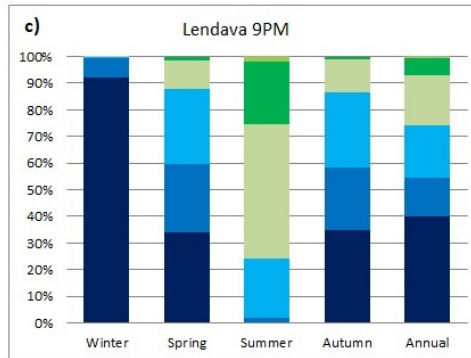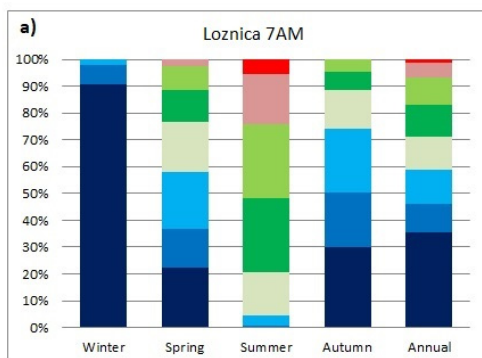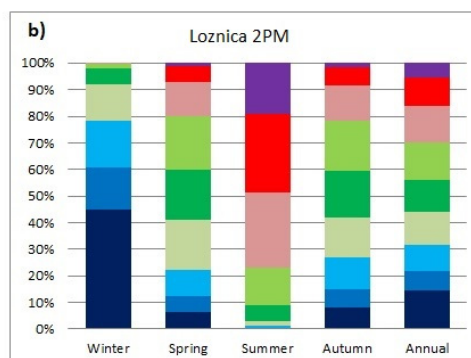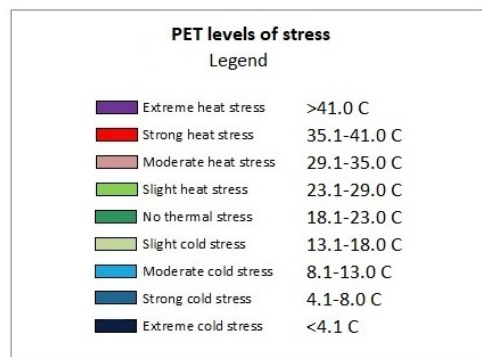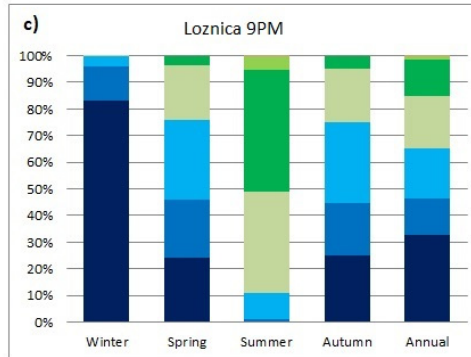



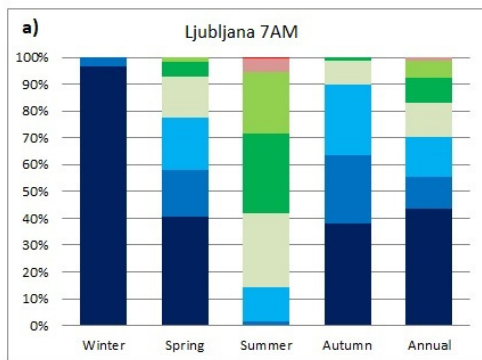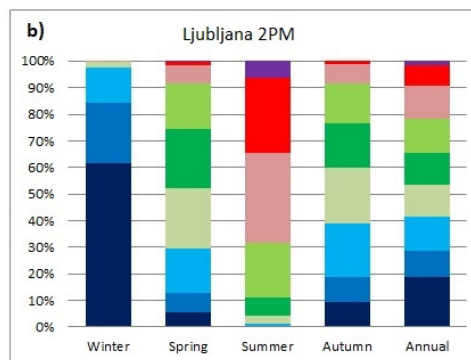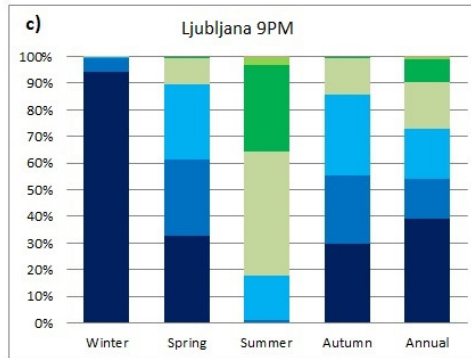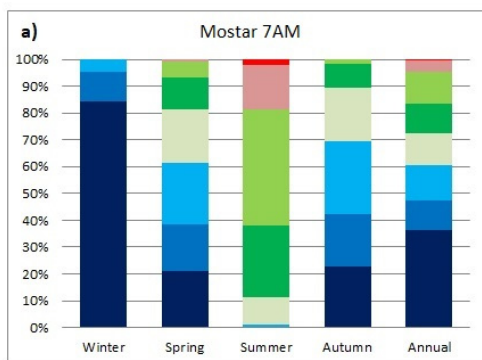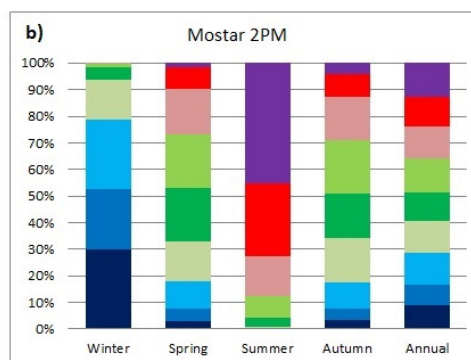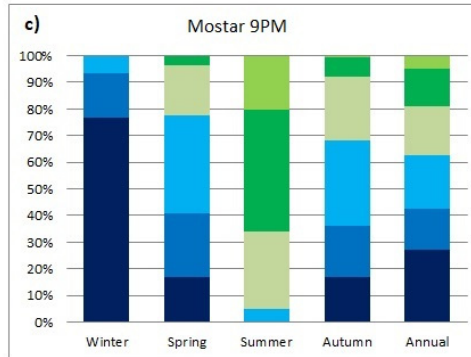

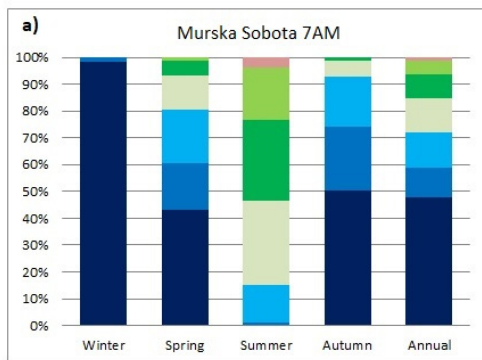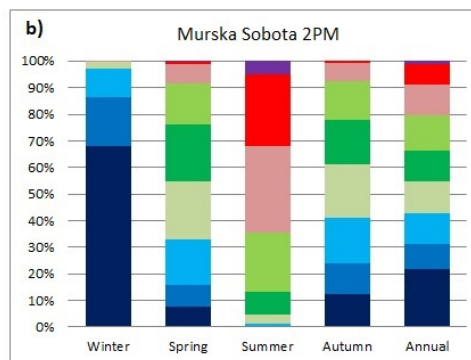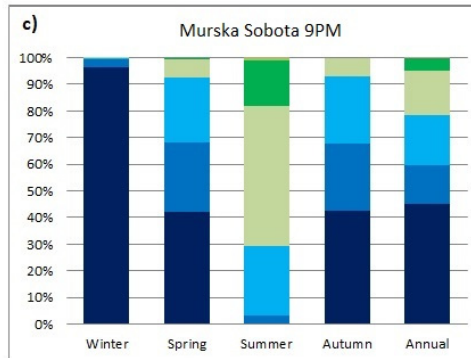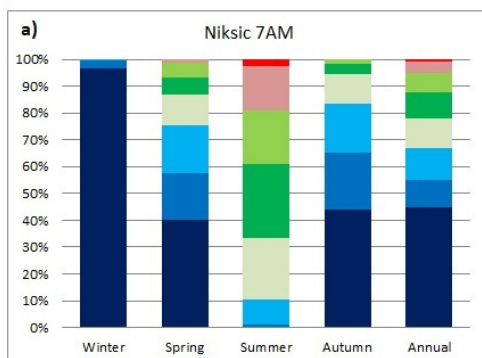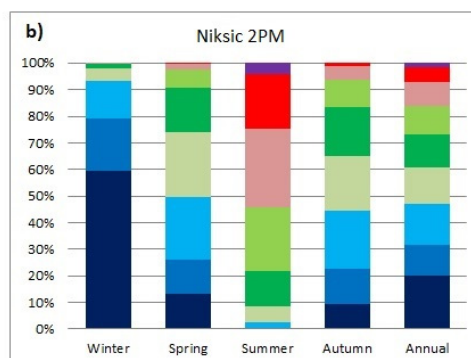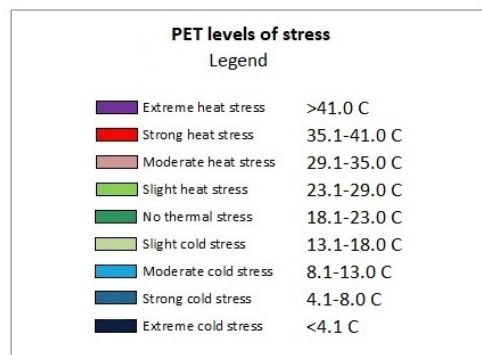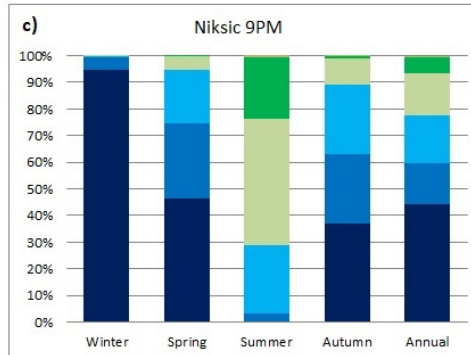

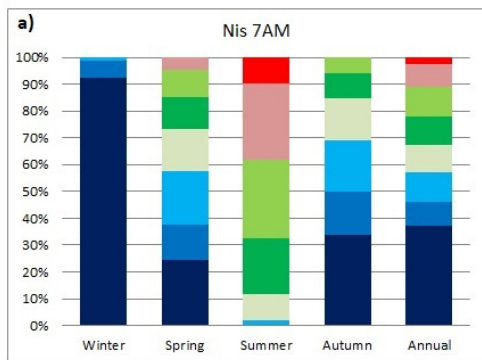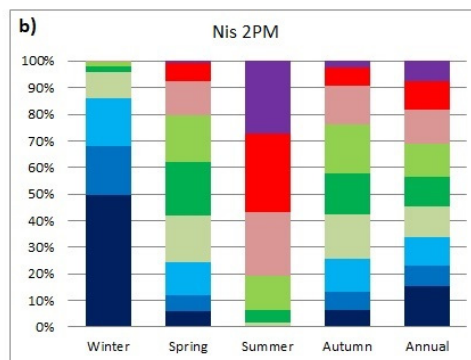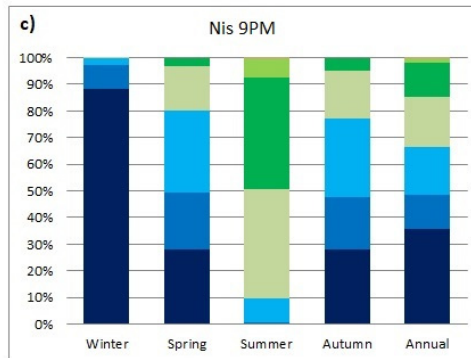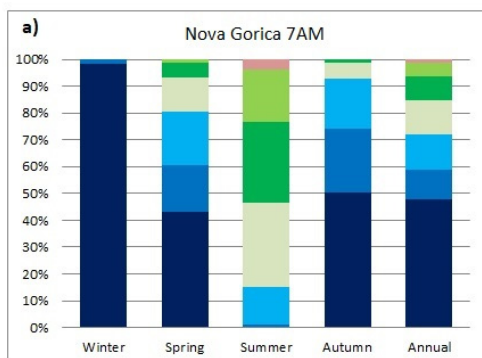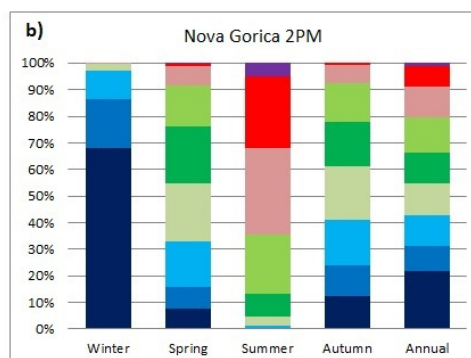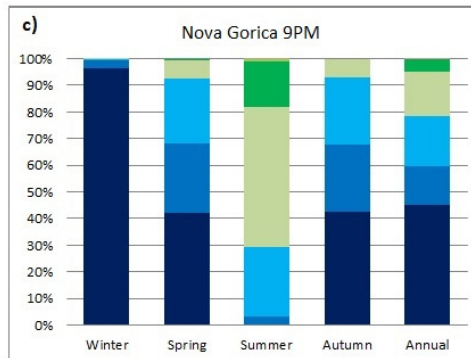

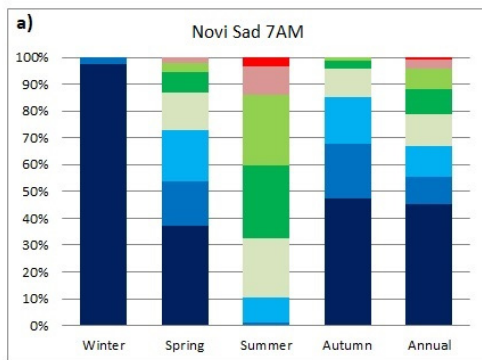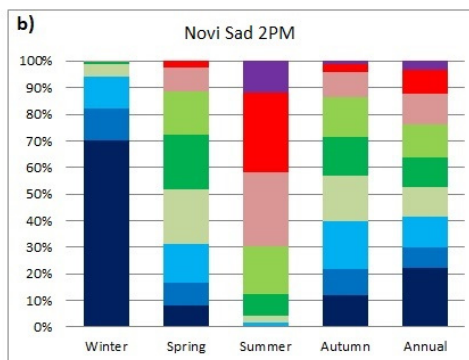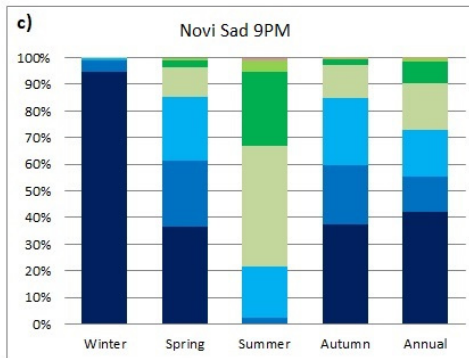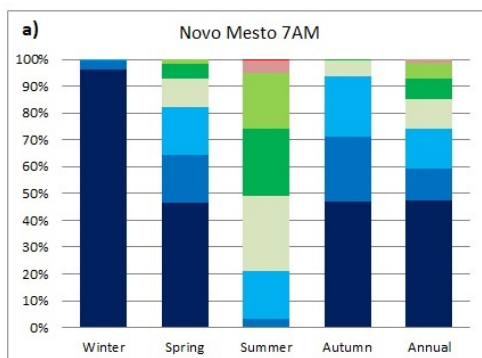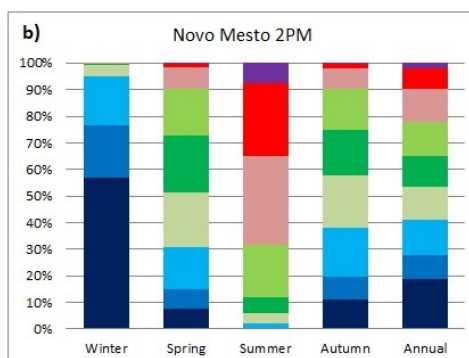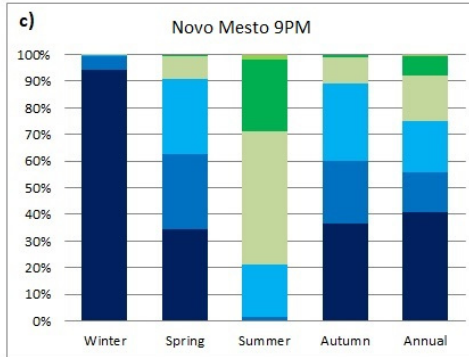



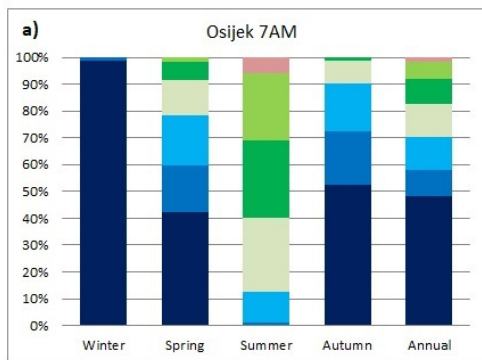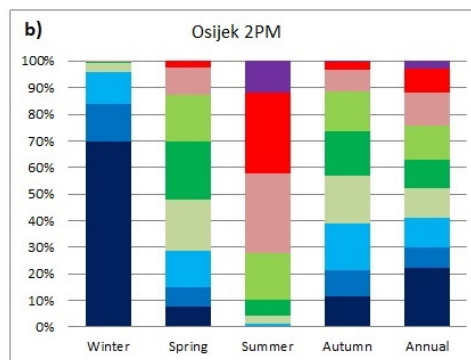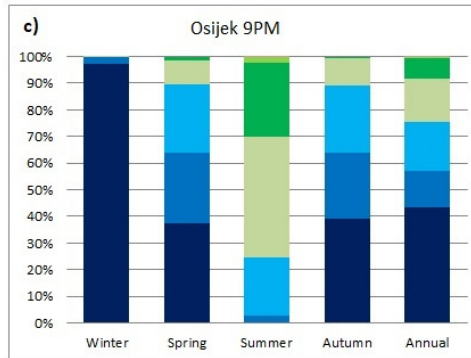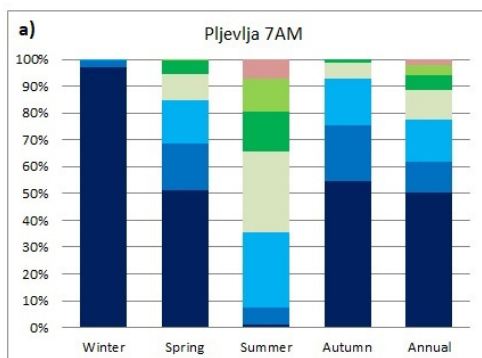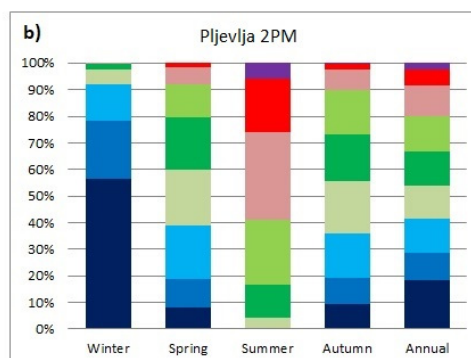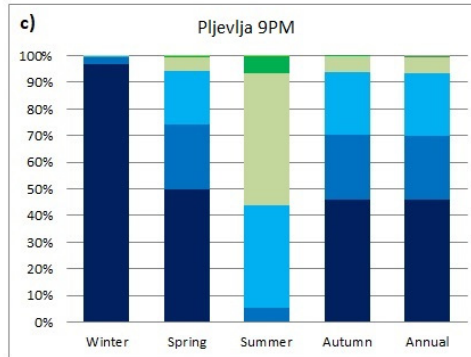

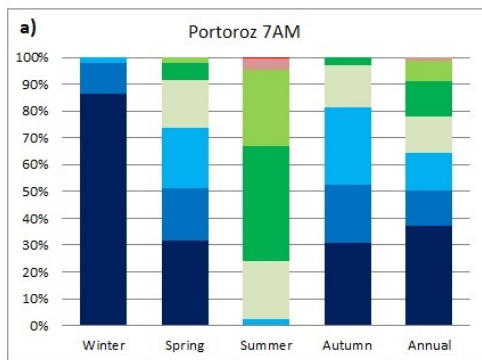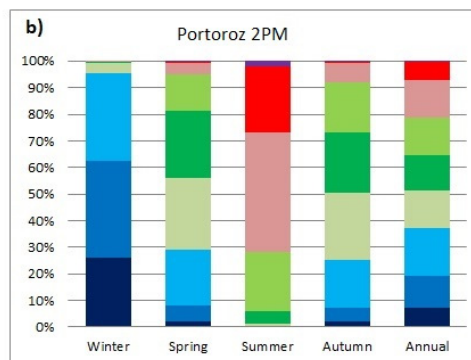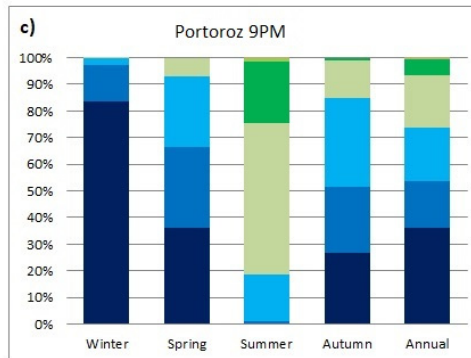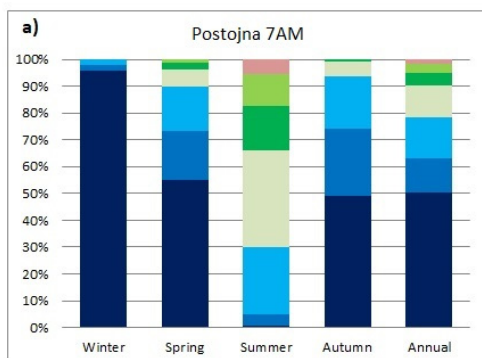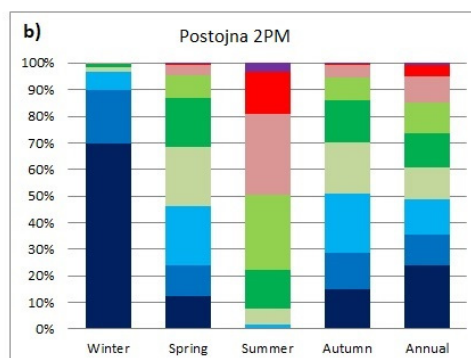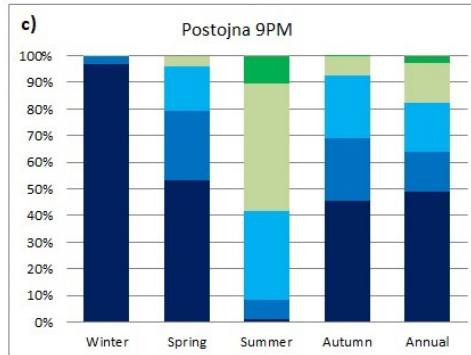

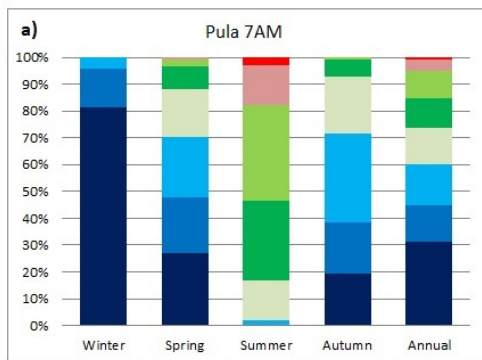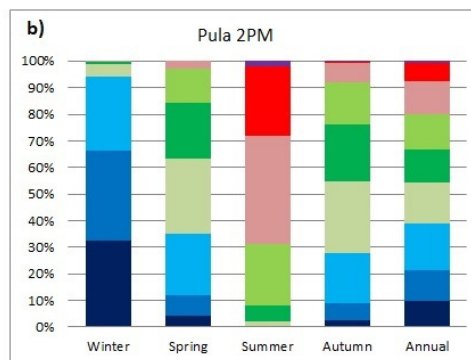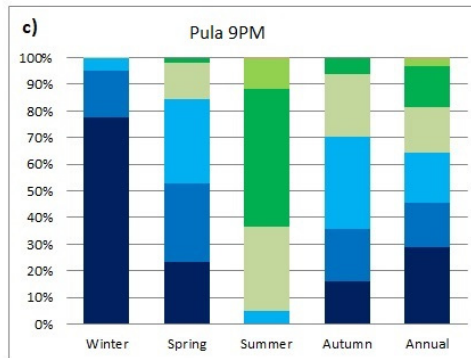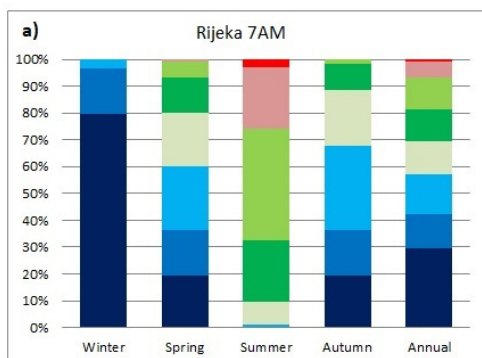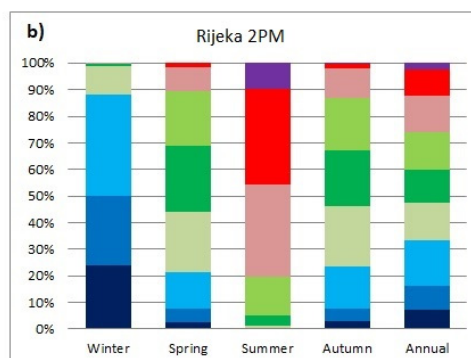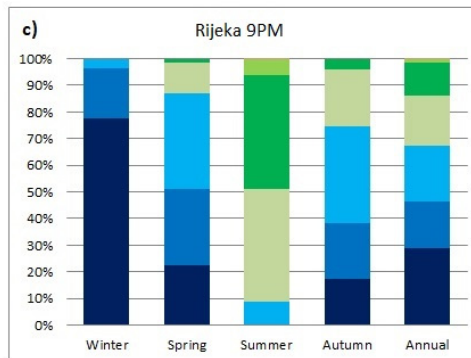

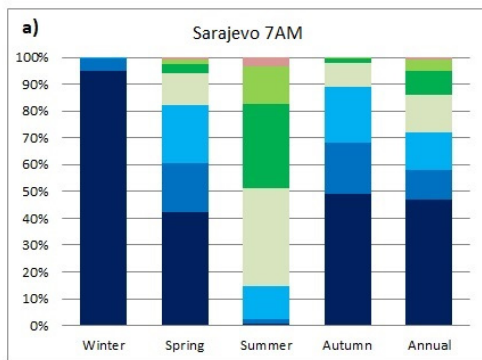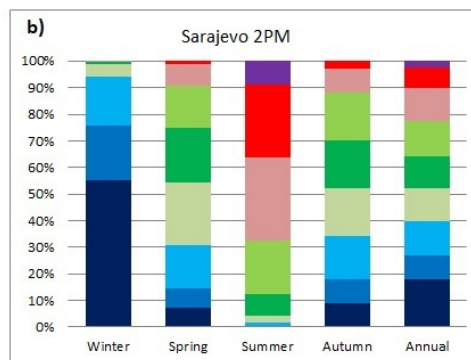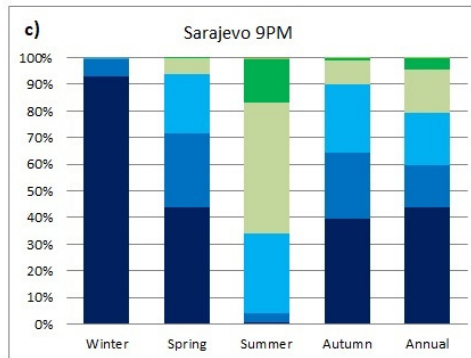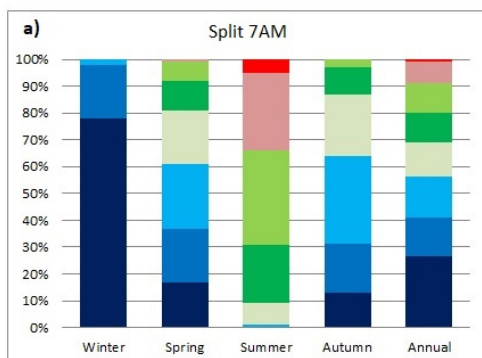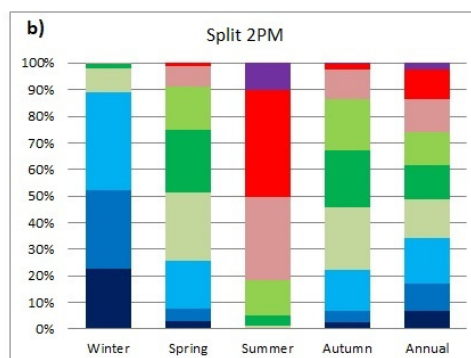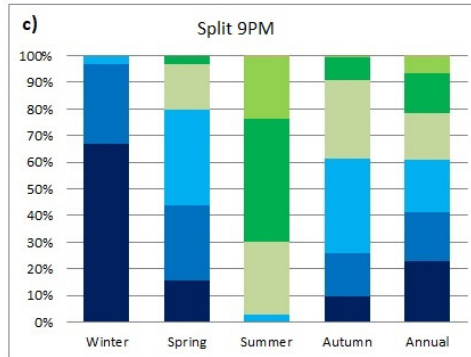



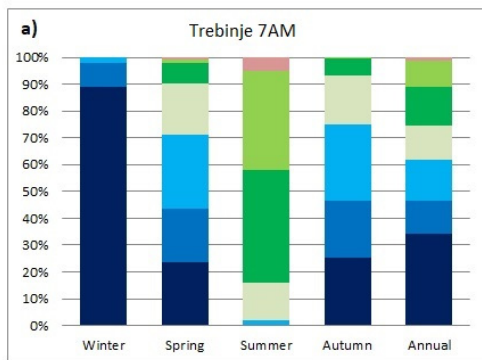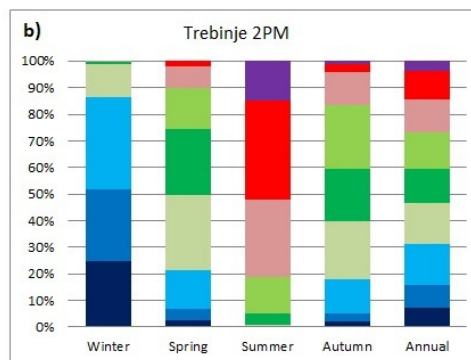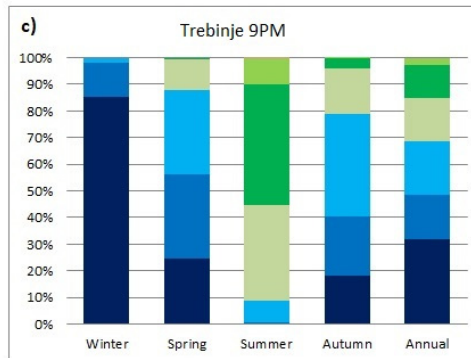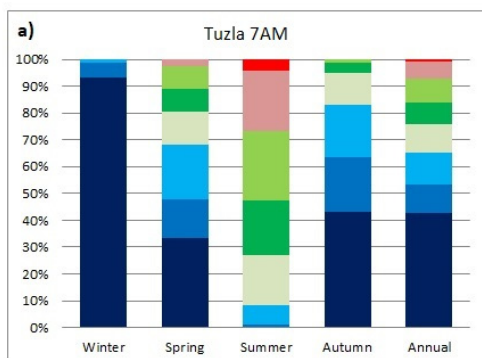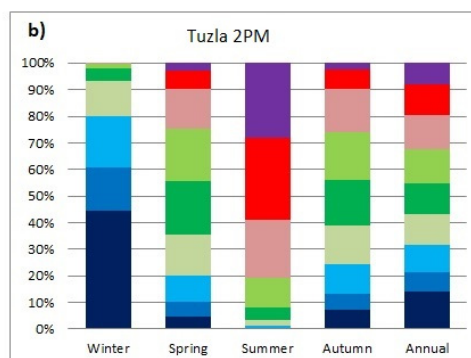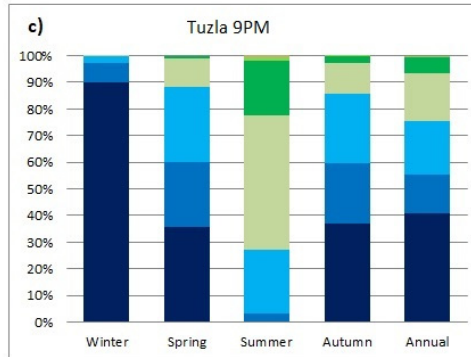

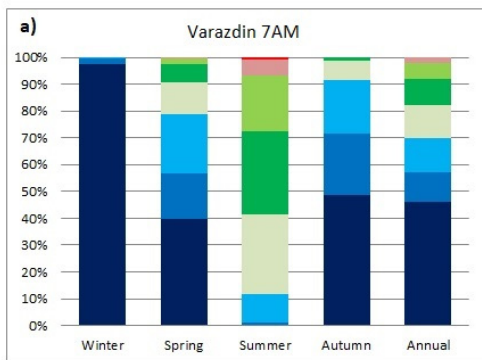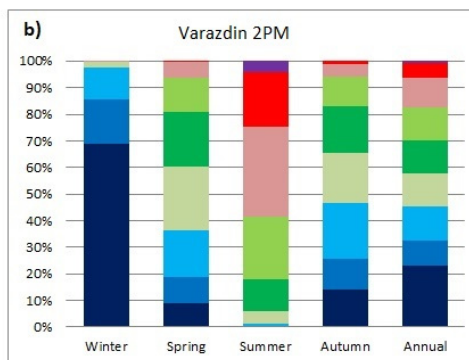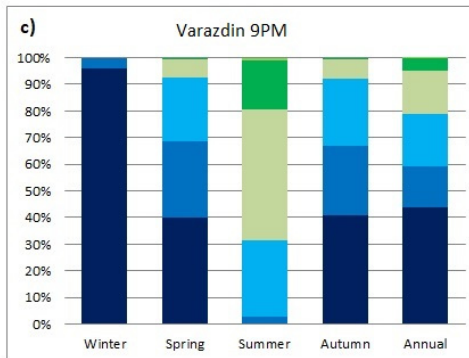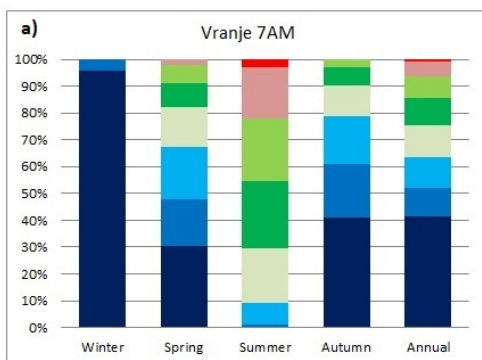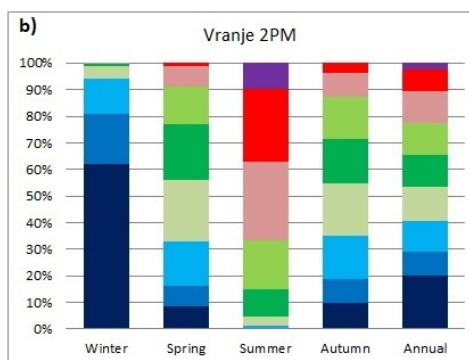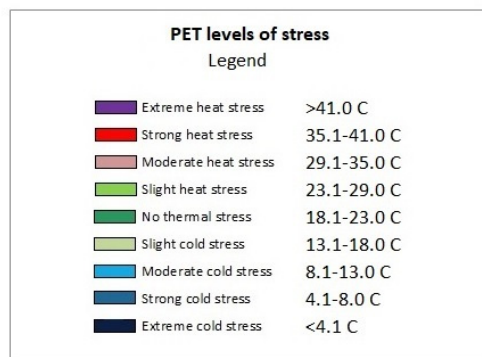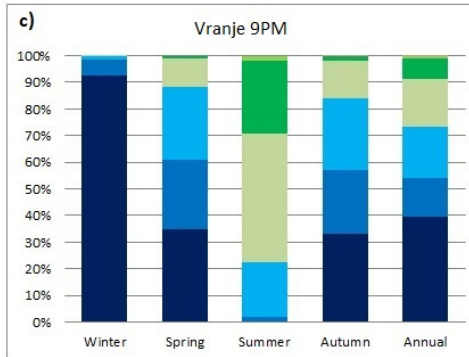

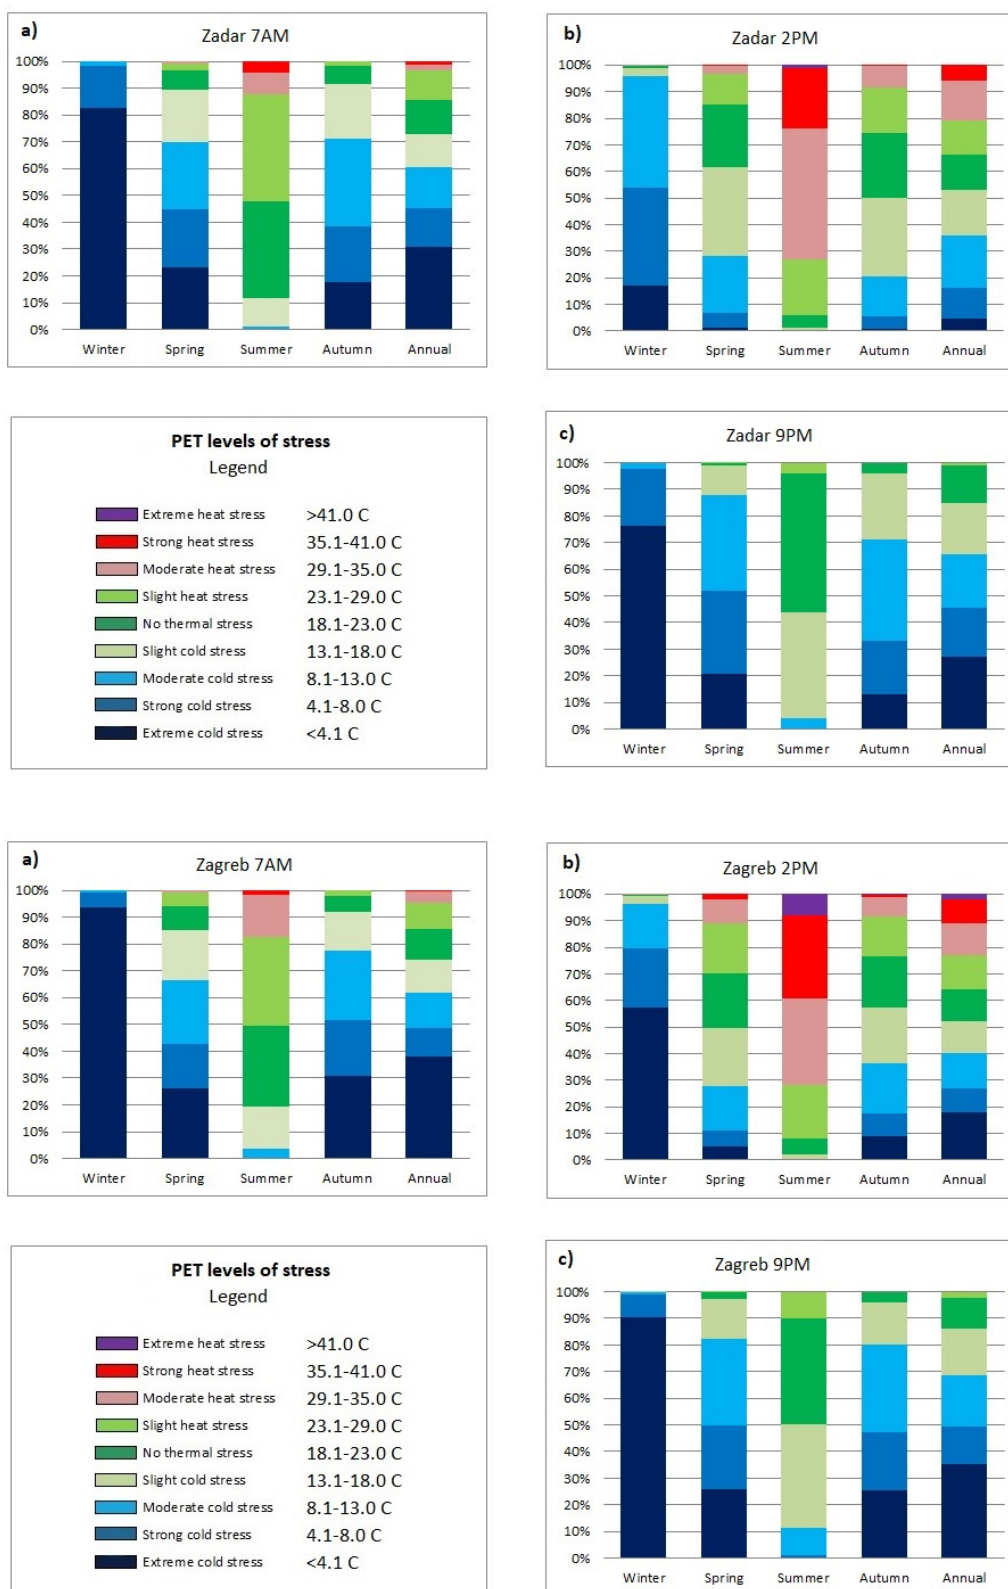

**Figure S2.** Frequency analysis (in %) of different PET stress levels at a) 7 am, b) 2 pm and c) 9 pm. Note: Measurement stations are arranged in alphabetical order. Belgrade, Podgorica and Zavižan measurement sites are presented and explained in more detail in the main text.





B

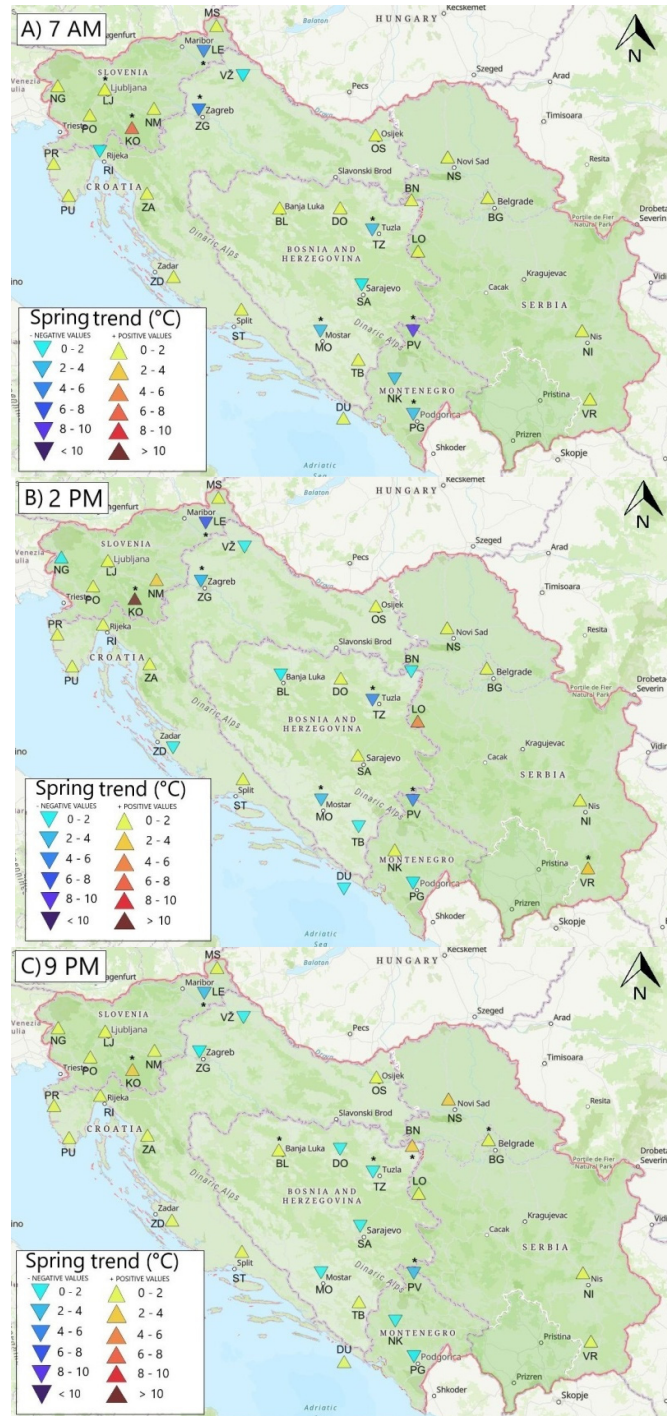

C

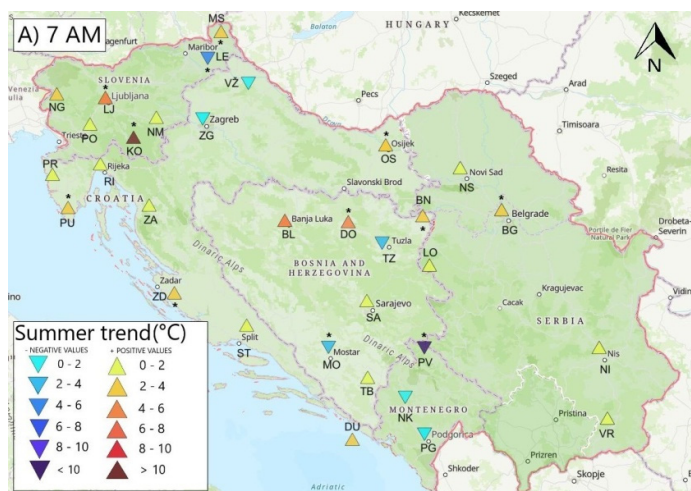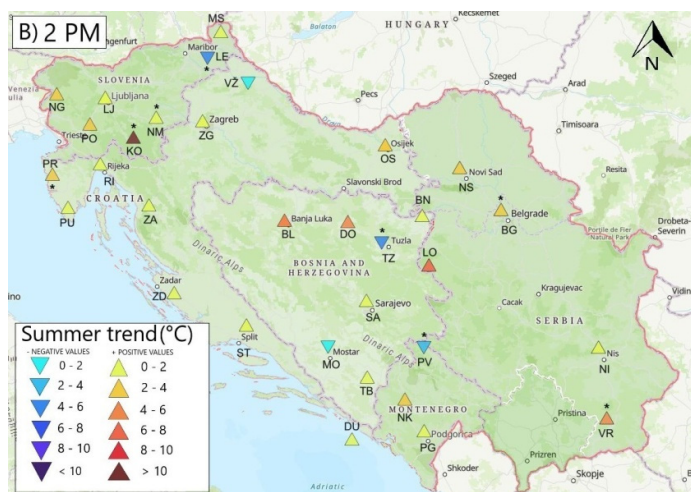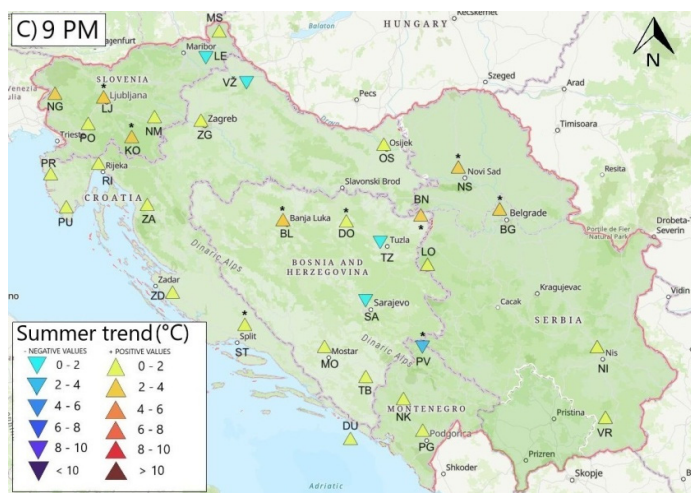



D

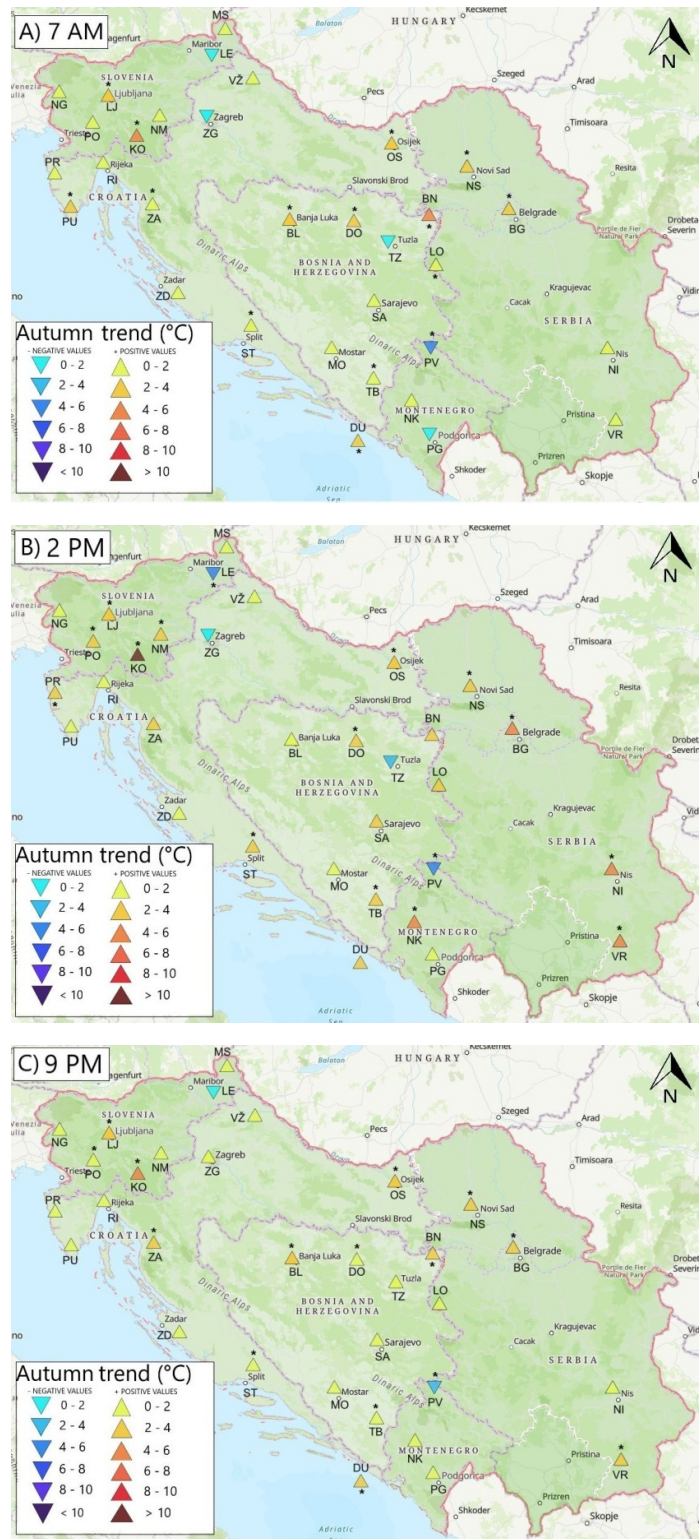

**Figure S3.** Seasonal (winter (A), spring (B), summer (C), autumn(D)) trends of averaged PET values across the research area for the period 2001–2020. Background map source: Esri, HERE, Garmin, FAO, NOAA, USGS. Note: The trends are expressed in °C per 20-year period. Statistically significant trends (95% of confidence level) are marked with an asterisk (\*). The letter marks a), b) and c) represent PET trends from measurement terms at 7 am, 2 pm, and 9 pm.
